# Supplementary material for: Using isotopes to constrain water flux and age estimates in snow-influenced catchments using the STARR (Spatially distributed Tracer-Aided Rainfall–Runoff) model
Source: Copernicus journal article supplement (doi:10.5194/hess-21-5089-2017), 2017-10-09
Supplement: Supplementary file 1 [file hess-21-5089-2017-supplement.zip]

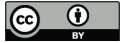

## *Supplement of*

# **Using isotopes to constrain water flux and age estimates in snow-influenced catchments using the STARR (Spatially distributed Tracer-Aided Rainfall–Runoff) model**

**Pertti Ala-aho et al.**

*Correspondence to:* Pertti Ala-aho ([pertti.ala-aho@abdn.ac.uk](mailto:pertti.ala-aho@abdn.ac.uk))

- [hess-21-5089-2017-supplement-title-page.pdf](#)
- [Catchment\\_flow\\_and\\_age\\_animation.mp4](#)

The copyright of individual parts of the supplement might differ from the CC BY 3.0 License.
